# Supplementary material
Source: PubMed Central journal article supplement (PMC7068114)

Fig. S1

**A**

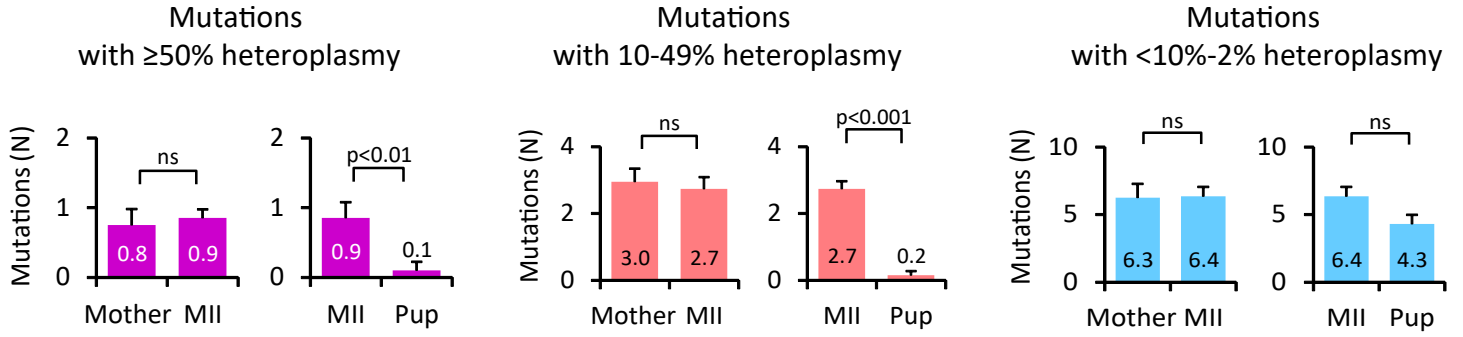

**B**

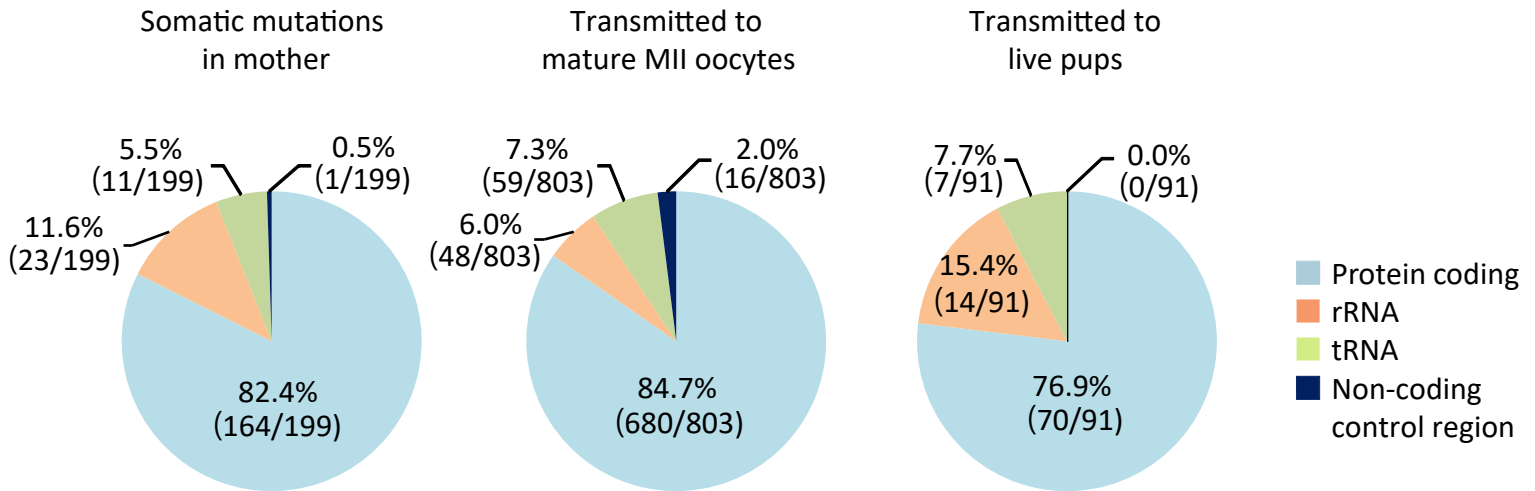

Supplement: figs1_ioz202.pdf [file figs1_ioz202.pdf]

Fig. S2

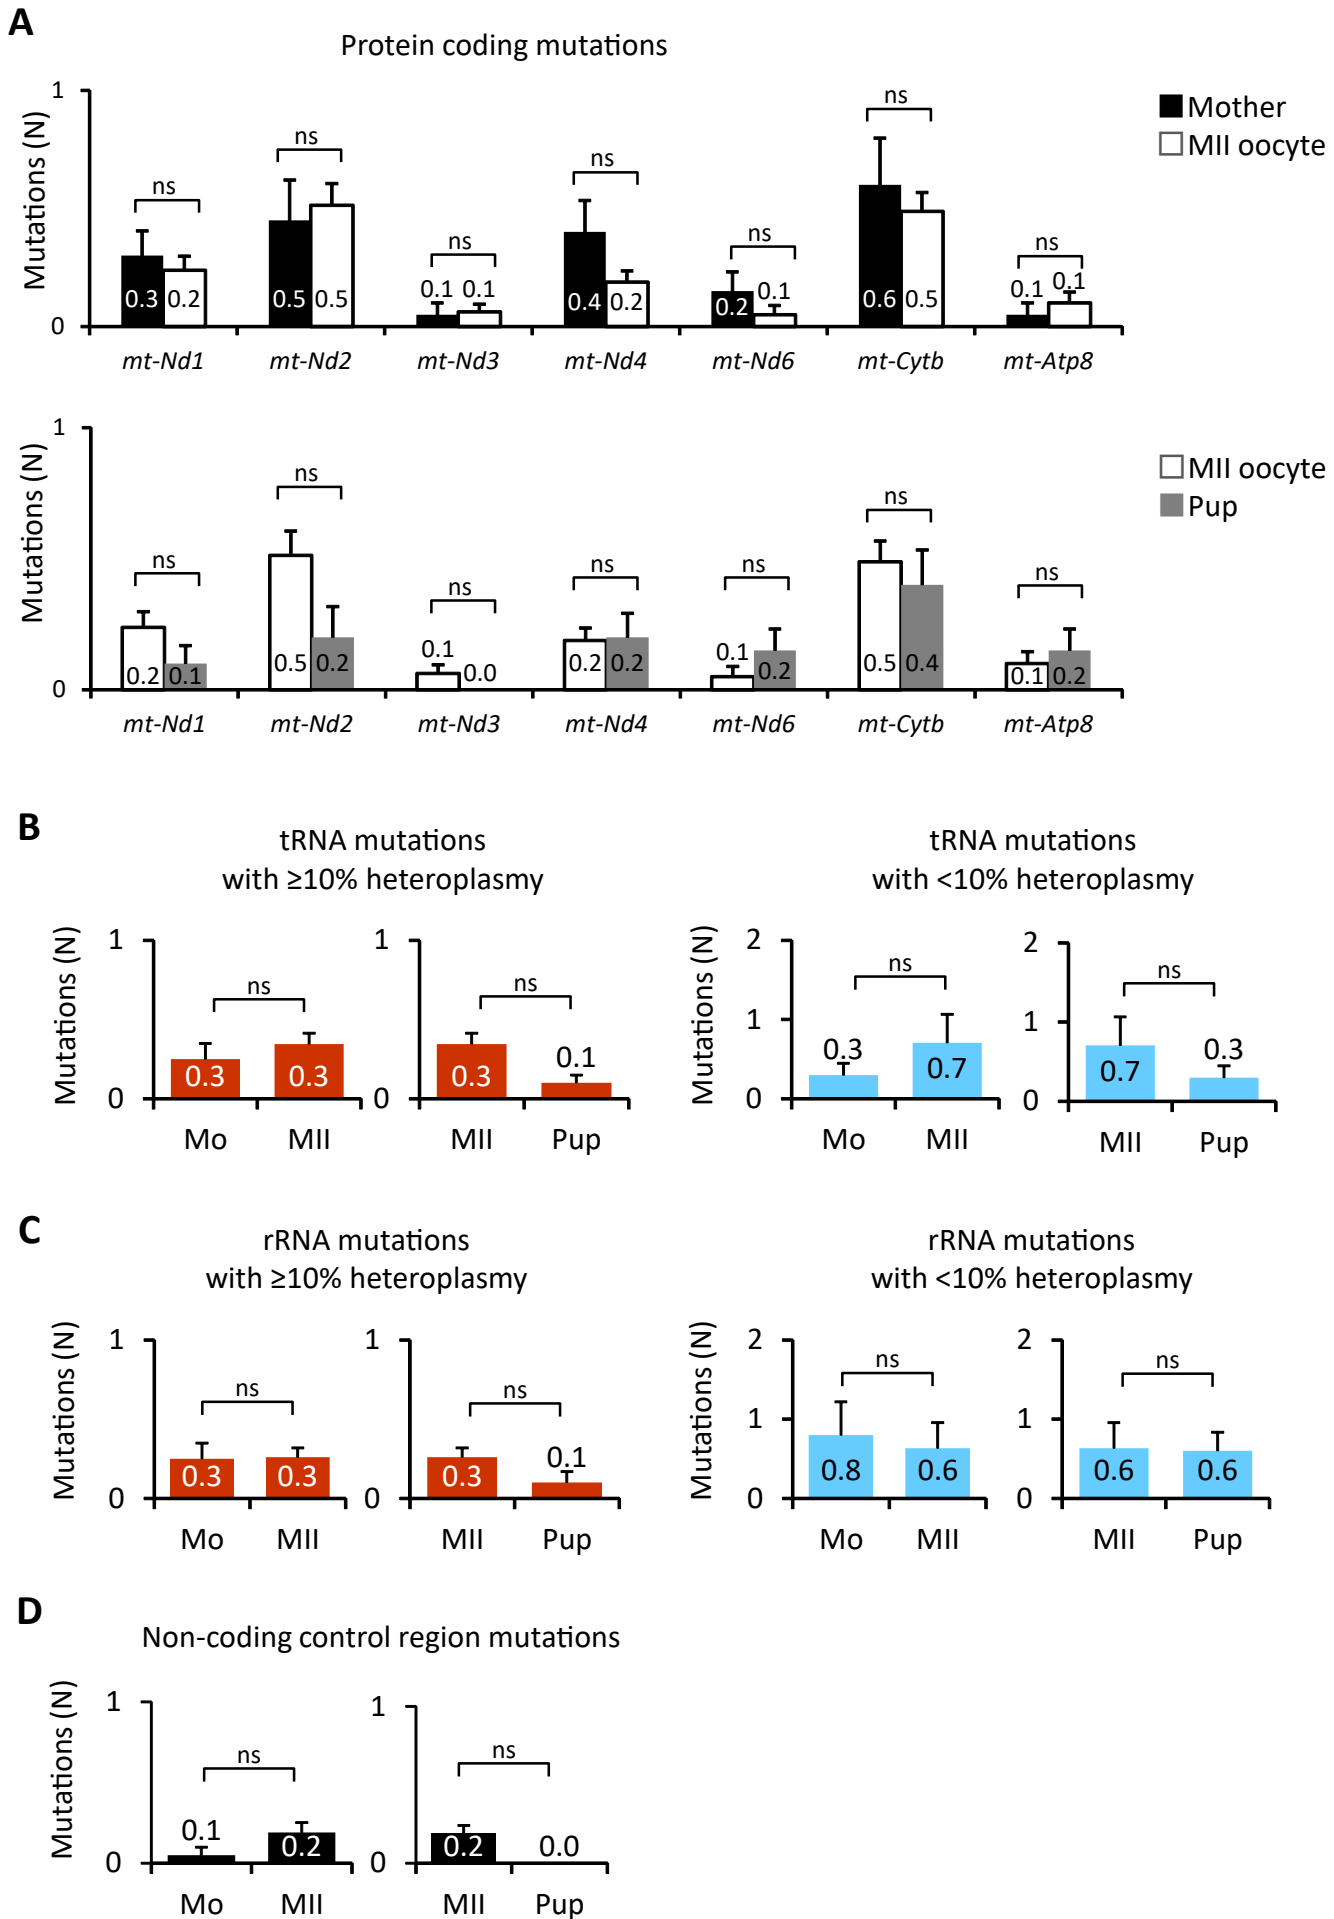

Supplement: figs2_ioz202.pdf [file figs2_ioz202.pdf]
